# Supplementary material for: Intraoperative imaging of hepatic cancers using γ-glutamyltranspeptidase-specific fluorophore enabling real-time identification and estimation of recurrence
Source: PubMed Central journal article supplement (PMC5471246; doi:10.1038/s41598-017-03760-3), 2017-06-14
Supplement: 41598_2017_3760_MOESM1_ESM.pdf [file 41598_2017_3760_MOESM1_ESM.pdf]

## **Supplementary materials**

### **Title**

Intraoperative imaging of hepatic cancers using  $\gamma$ -glutamyltranspeptidase-specific fluorophore enabling real-time identification and estimation of recurrence

### **Author list**

Yoichi Miyata

Takeaki Ishizawa\*

Mako Kamiya

Suguru Yamashita

Kiyoshi Hasegawa

Aya Ushiku

Junji Shibahara

Masashi Fukayama

Yasuteru Urano\*

Norihiro Kokudo

**Supplementary Table S1 Patient clinicopathological characteristics**

| Characteristics                 | HCC<br>48 patients      | ICC<br>8 patients | CRLM<br>39 patients |
|---------------------------------|-------------------------|-------------------|---------------------|
| Age (years)                     | 68 (34–87) <sup>a</sup> | 73 (58–88)        | 69 (44–84)          |
| Male                            | 41 (85%)                | 3 (38%)           | 25 (64%)            |
| Hepatitis B and/or C positive   | 36 (75%)                | 2 (25%)           | 4 (10%)             |
| Preoperative chemotherapy       | 15 (31%)                | 1 (13%)           | 15 (38%)            |
| Liver cirrhosis                 | 19 (40%)                | 0 (0%)            | 0 (0%)              |
| Preoperative blood examinations |                         |                   |                     |
| GGT (U/L)                       | 48 (16–593)             | 37 (15–646)       | 47 (13–436)         |
| Albumin (g/dL)                  | 3.8 (2.6–4.7)           | 4.3 (3.7–4.8)     | 3.8 (2.1–4.5)       |
| ICGR15 (%)                      | 11.8 (5.20–41.2)        | 8.5 (4.50–21.7)   | 8.1 (4.00–20.7)     |

<sup>a</sup>Data are the median (range) or *n* (%). HCC, hepatocellular carcinoma; ICC, intrahepatic cholangiocarcinoma; CRLM, colorectal carcinoma liver metastasis; GGT,  $\gamma$ -glutamyltranspeptidase; ICGR15, indocyanine green retention rate at 15 min.

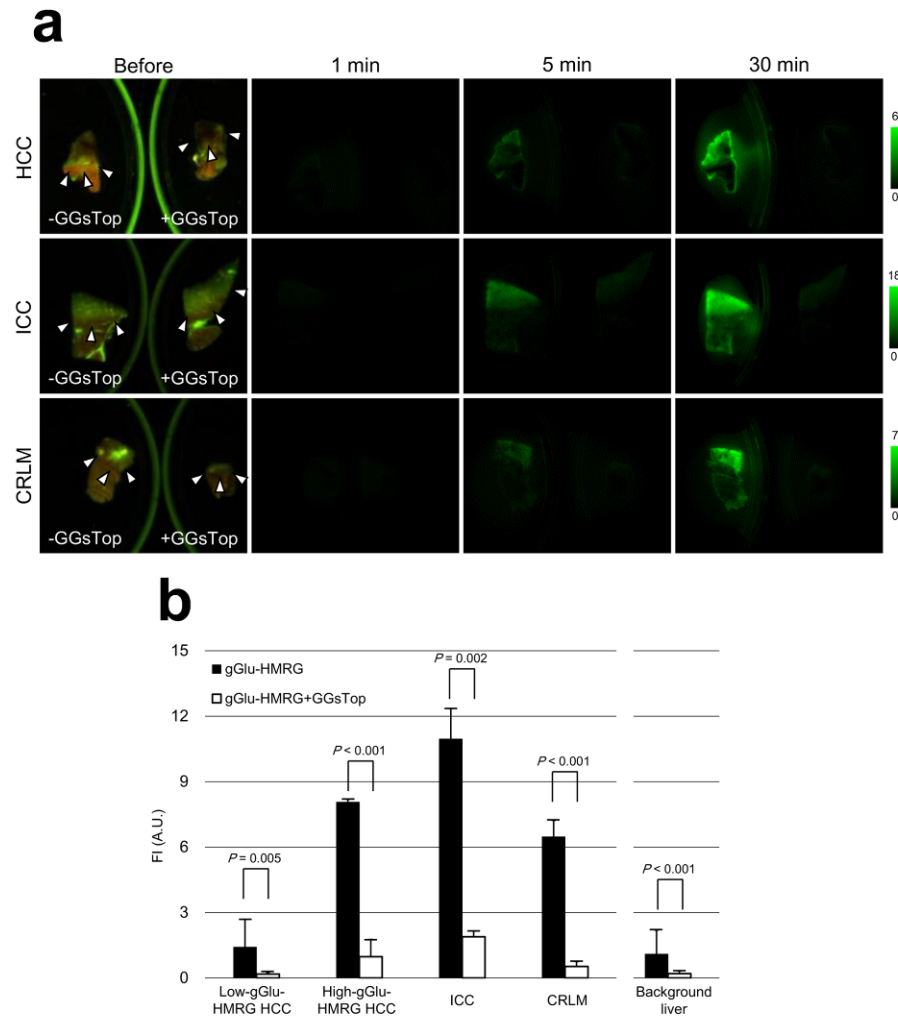

**Supplementary Figure S2.** Reduction of gGlu-HMRG fluorescence in HCC, ICC, and CRLM by co-application of a GGT inhibitor.

(a) Fluorescence images of paired resected specimens before and at 1, 5, and 30 min after topical administration of either gGlu-HMRG alone (left side) or gGlu-HMRG mixed with the GGT inhibitor GGSTop (right side). Fluorescence signals were grossly unidentifiable in the presence of the GGT inhibitor. (b) Fluorescence intensities (FIs, in arbitrary units) at 30 min after administration of gGlu-HMRG with or without GGSTop. Data are the median and upper quartile pairs of  $n = 12, 9, 4, 13,$  and  $38$  for Low-gGlu-HMRG HCC, High-gGlu-HMRG HCC, ICC, CRLM, and Background liver, respectively.

ICC, CRLM, and background liver parenchyma, respectively. Inhibition of GGT significantly reduced the FIs for each tissue type examined

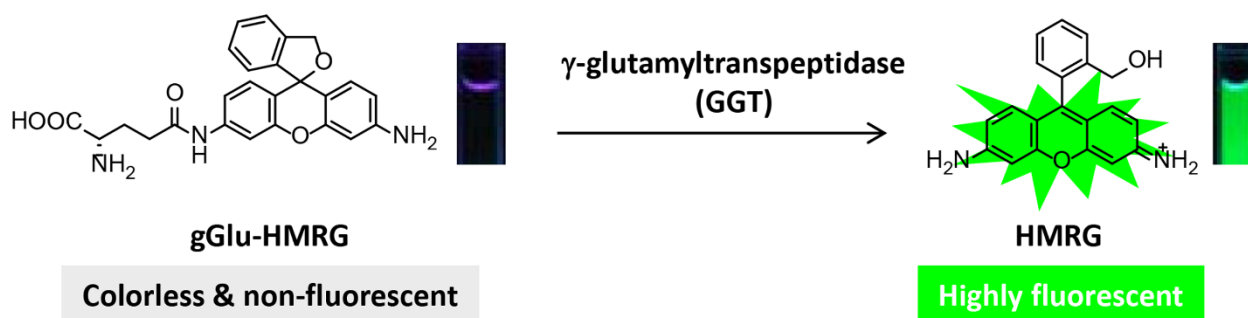

**Supplementary Figure S3.** Chemical structure of gGlu-HMRG.

gGlu-HMRG was colorless and non-fluorescent fluid in its native state. After administration of GGT, gGlu-HMRG is rapidly hydrolyzed and emit fluorescence with a peak wavelength of 520nm.
